# Supplementary material for: Identification of Catalytic Residues Using a Novel Feature that Integrates the Microenvironment and Geometrical Location Properties of Residues
Source: PLOS journal article supplement (doi:10.1371/journal.pone.0041370), 2012-07-19
Supplement: S1 (10.1371/journal.pone.0041370.s001) [file journal.pone.0041370.s001]

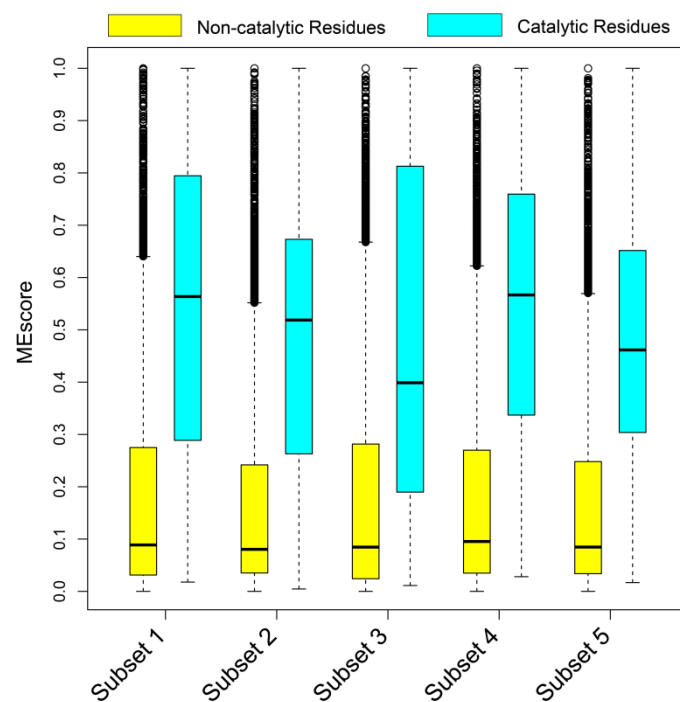

**Figure S1.** The MEdistribution across the five subsets in 5-fold cross-validation tests. Generally, MEdistribution have similar distributions in different subsets. Compared with other subsets, the catalytic residues in subset 3 have lower MEdistribution, possibly due to the presence of more unique folds in this subset.
