# Supplementary material for: Identification of Catalytic Residues Using a Novel Feature that Integrates the Microenvironment and Geometrical Location Properties of Residues
Source: PLOS journal article supplement (doi:10.1371/journal.pone.0041370), 2012-07-19
Supplement: S2 (10.1371/journal.pone.0041370.s002) [file journal.pone.0041370.s002]

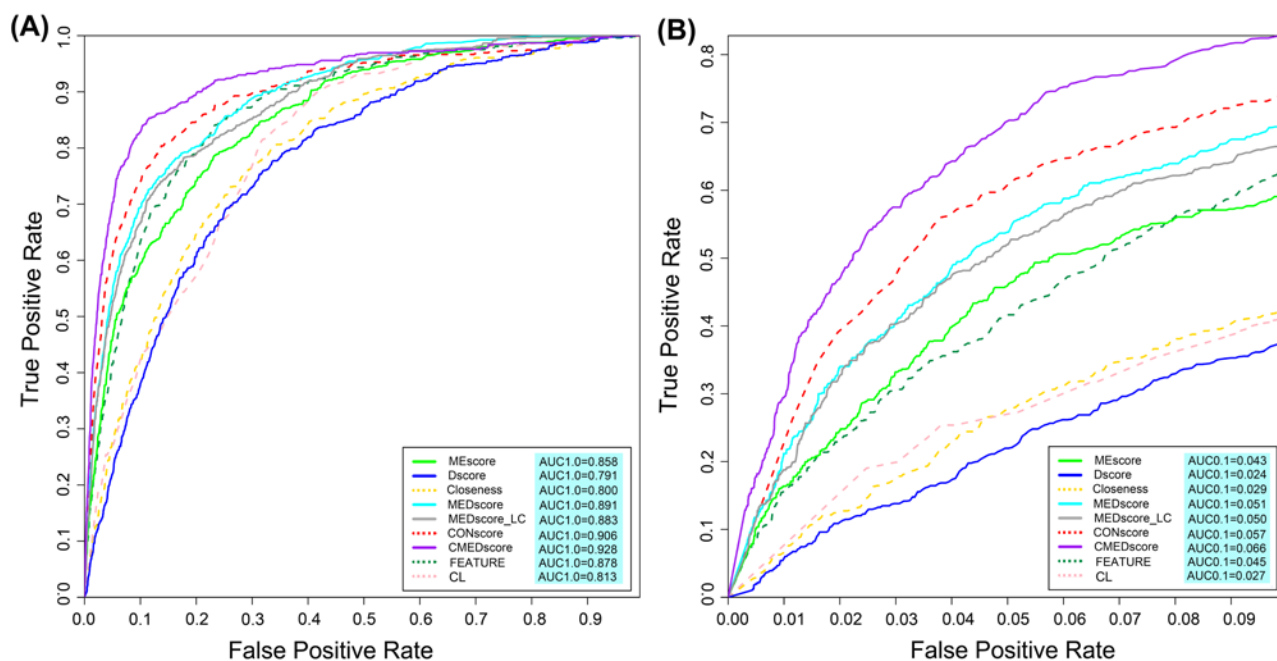

**Figure S2.** The ROC curves of different features/predictors on per enzyme basis. A ROC curve was prepared for each enzyme domain and the reported ROC curve was averaged over the 223 enzyme domains. Panel A gives the ROC curves at each possible false positive rate control, while panel B only plots ROC curves at a false positive rate  $\leq 10\%$ .
