# Supplementary material for: Identification of Catalytic Residues Using a Novel Feature that Integrates the Microenvironment and Geometrical Location Properties of Residues
Source: PLOS journal article supplement (doi:10.1371/journal.pone.0041370), 2012-07-19
Supplement: S5 (10.1371/journal.pone.0041370.s005) [file journal.pone.0041370.s005]

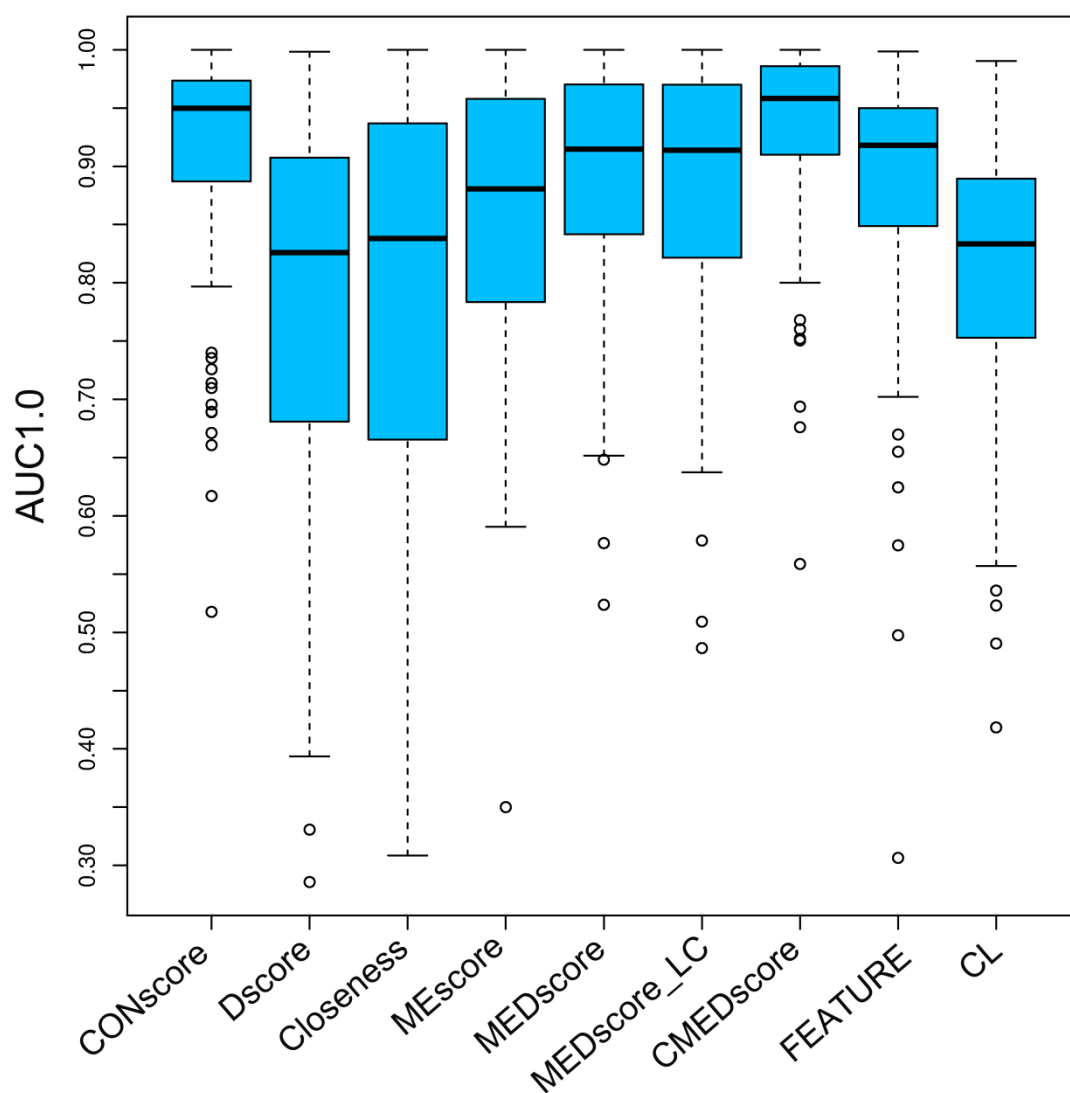

**Figure S5.** The performance variation of different features/predictors in different structural folds. Generally, all the features/predictors show a variable performance in different folds. Comparatively, the geometrical properties-related features (e.g. Dscore and Closeness) are more variable.
